# DETECTING SHARED INDEPENDENT SELECTION

Nathan S. Harris and Alan R. Rogers

April 21, 2020

## Abstract

Signals of selection are not often shared between populations. When a mutual signal is detected, it is often not known if selection occurred before or after populations split. Here we develop a method to detect genomic regions at which selection has favored different haplotypes in two populations. This method is verified through simulations and tested on small regions of the genome. This method was then expanded to scan the phase 3 genomes of the 1000 Genomes Project populations for regions in which the evidence for independent selection is strongest. We identify several genes which likely underwent selection independently in different populations.

## 1 INTRODUCTION AND BACKGROUND

Signals of selection are sometimes shared between closely related populations (Johnson and Voight, 2018; Pickrell et al., 2009). Some of these shared signals reflect “ancestral selection,” which occurred in the population ancestral to the two populations that share the signal. Conversely, populations with similar environmental conditions may experience “independent selection,” for mutations that arose independently in the same region of the genome. Closely related populations should share more of these independent signals as well because they are more likely to live in similar environments.

However, efforts to differentiate between these two scenarios are limited. Because we cannot always identify the variant being favored, efforts to study shared signals have focused on overlapping signals (e.g. (Johnson and Voight, 2018)). More recently, Harris and DeGiorgio (2019) developed a method to distinguish between ancestral and independent selection based on measuring the difference in the frequency of sweeping haplotypes. Here we develop a method to distinguish between ancestral and independent selection without the need to determine the underlying sweeping haplotypes.

Voight et al. (2006) introduced the integrated haplotype score (iHS) to measure classic selective in genome-wide data. iHS measures the disparity in linkage disequilibrium between carriers of opposite alleles at a given site. Large negative iHS values indicate a disproportionate amount of LD around the derived allele, implying that it has increased in frequency relatively rapidly.

37 Large positive values of  $iHS$  indicate a similar scenario for the ancestral allele.  
38 Usually, only the magnitude of  $iHS$  is considered, as new beneficial alleles, the  
39 target of selection, occur on haplotypes with an essentially random arrange-  
40 ment of ancestral and derived alleles.

41 Retaining the sign of  $iHS$  provides information about variation on the fa-  
42 vored haplotype. While two populations may have similar  $|iHS|$  magnitudes,  
43 scores at individual sites may have opposite signs. This situation indicates se-  
44 lection at a site in both populations, but for different alleles. This will likely  
45 happen when two populations split before selection occurred and the back-  
46 ground variation around independently selected loci reflects independently  
47 accumulated variation in each lineage. If two populations have split recently,  
48 a beneficial mutation sweeping in their common ancestor may end up in both  
49 daughter populations, along with the haplotype on which it occurred. In this  
50 scenario, two populations would likely have similar  $iHS$  magnitudes *and* signs.

## 51 2 RESULTS

52 **The independent selection index** Comparing  $iHS$  values while retaining the  
53 sign allows indirect comparison of sweeping haplotypes. We use this principal  
54 to develop a method for identifying genomic regions in which positive selec-  
55 tion has occurred independently in two populations. Within 100-kb windows,  
56 we calculated the Independent Selection Index ( $ISI$ ):

$$ISI = \frac{1}{K} \sum_{j=1}^K \left\{ |iHS_j^{(x)} \cdot iHS_j^{(y)}| - iHS_j^{(x)} \cdot iHS_j^{(y)} \right\} \quad (1)$$

57 where  $j$  indexes the  $K$  sites within the window, and  $iHS_j^{(z)}$  is the signed  $iHS$   
58 value at site  $j$  in population  $z$ . The  $j$ th term in this sum equals zero when  $iHS$   
59 has the same sign in both populations but is positive if the signs differ.  $ISI$  will  
60 be near zero when the same haplotype has been favored in both populations,  
61 because in that case, the signs will be the same.  $ISI$  becomes increasingly posi-  
62 tive when different haplotypes are favored, because then the signs will tend to  
63 differ.

64 Simulations were performed using Selection on Linked Mutations (SLiM)  
65 package (Messer, 2013; Haller and Messer, 2018). Simulations were run using  
66 three scenarios: neutral, positive selection before population splits, and posi-  
67 tive selection following population splits. In each case, simulations modelled  
68 a single population that splits in two at a range of pre-specified times. Neutral  
69 scenarios contain only mutations with no effect. In both cases of positive selec-  
70 tion, a single beneficial mutation is introduced into the population. In half of  
71 the simulations a functionally equivalent mutation occurs in both populations  
72 at the same site following the population split. This represents the scenario  
73 in which two populations experience independent selection at the same locus  
74 following the split from a common ancestor. The placement of these mutations  
75 ensures that signals of selection will be in the same location in the simulated

76 data, and the similarity of iHS values of sites around the introduced mutations  
77 will affect ISI. In the other half of the positive simulations, the beneficial al-  
78 lele is introduced in the common ancestor of the two populations. Beneficial  
79 mutations arise in the ancestral population during an interval  $(t, 2t)$ , measured  
80 backwards from the present. Here,  $t$  is the time when the ancestral population  
81 splits. The mutations remain advantageous, even after the split. On average,  
82 these mutations are under positive selection twice as long as in the previous  
83 model. Because of this, the selective advantage in these scenarios is halved.

84 In all simulations a single beneficial mutation occurs in the middle of the  
85 chromosome. Large ISI values should occur where both populations have large  
86 iHS scores with opposite signs at the same loci. Figure 1 shows the simulation  
87 with the largest value of ISI. Figures 2 and 3 show Manhattan plots for ISI  
88 for the different divergence times. We find that the simulations in which the  
89 beneficial mutation is under selection in the common ancestor of two popula-  
90 tions do not produce extreme values of this statistic, and the largest scores are  
91 randomly distributed across the simulated chromosome (Figure 4). Large val-  
92 ues of ISI occur when selection has occurred independently following the split  
93 from the common ancestor. The regions with the largest ISI values in these  
94 cases either contain the causative variant, or are adjacent to it.

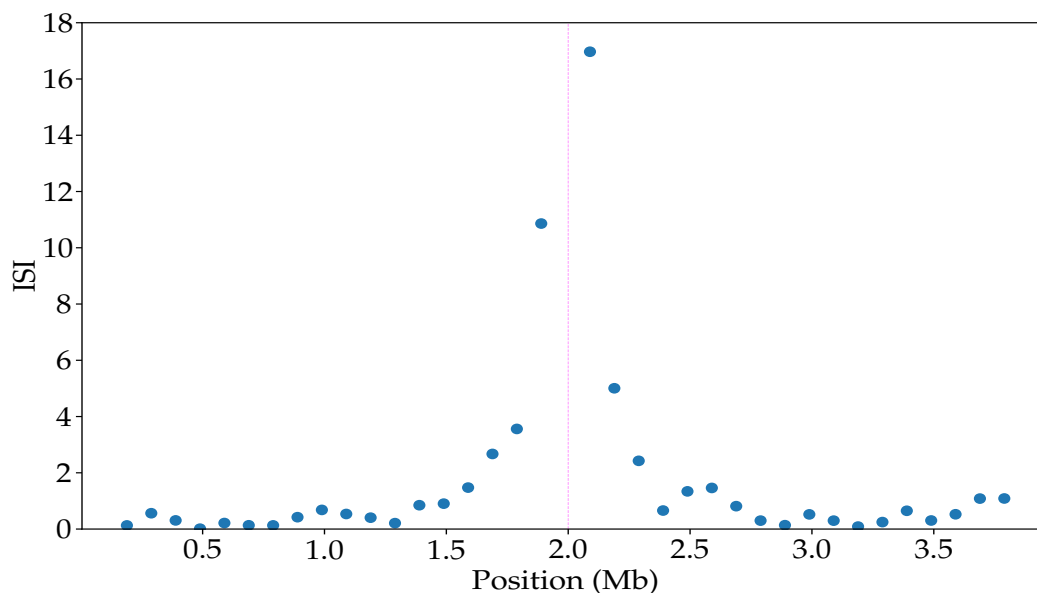

Figure 1: For illustration, the results of the simulation with the largest value of ISI. ISI between simulated populations for simulations in which a single beneficial mutation occurs *after* a population split.

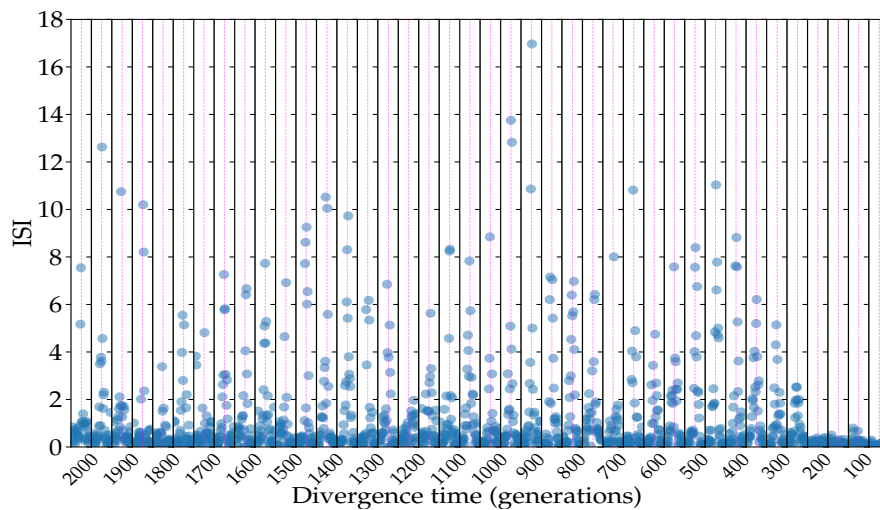

Figure 2: ISI between simulated populations for simulations in which a single beneficial mutation occurs *after* a population split. With the exception of very recent divergence times, the signal of independent selection is identified. The beneficial mutation is placed in the middle of the chromosome, indicated by the dashed line.

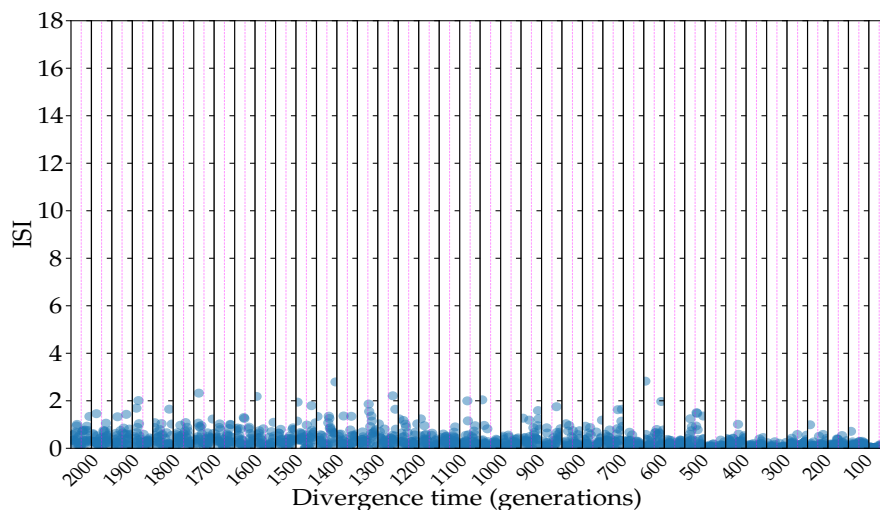

Figure 3: ISI between simulated populations for simulations in which a single beneficial mutation occurs *before* a population split. Both populations experience a signal of selection in the same region, but it is not detected at any divergence time. The beneficial mutation is placed in the middle of the chromosome, indicated by the dashed line.

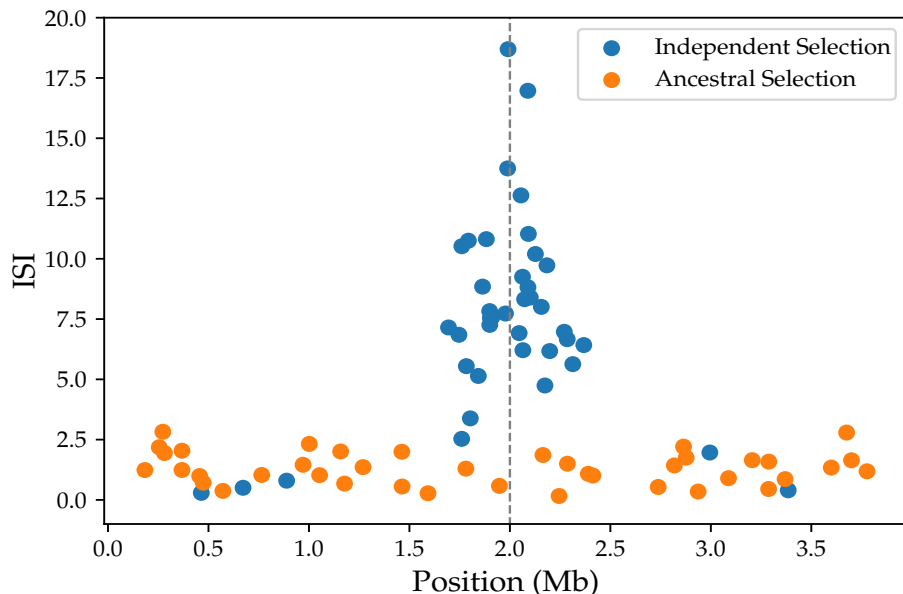

Figure 4: The top ISI scores from each simulation are plotted together. In general, we see that ISI successfully identifies regions near the introduced beneficial mutation (vertical dashed line) when selection occurs after a population split but not when it occurs before. There are five divergence times at which ISI produces a false negatives. Four of these are the most recent divergence times, suggesting ISI is not sensitive to independent selection in the very recent past.

95 **Cases of independent Selection** Next, this method was applied to LCT and  
96 the glycoporphin cluster. Figure 5 shows ISI values around the LCT gene in Eu-  
97 ropean populations. Not surprisingly, most population pairs have very low  
98 values of ISI. However, comparisons with TSI have relatively elevated ISI val-  
99 ues, implying that selection at LCT may be occurring on different haplotypes  
100 than those sweeping in the rest of Europe. The signal around the glycoporphin  
101 cluster is shared across a wider range of populations, with large iHS signals  
102 present in all 1000 genomes populations measured (see Appendix C.). Varia-  
103 tion in beneficial haplotypes occurs both within continental regions (Figure 6),  
104 and between continental regions (Figure 7) as predicted above.

105 **ISI across the genome** This method was next applied to every pair of 1000  
106 Genomes Phase 3 populations across the entire genome. Figure 8 shows an ex-  
107 ample of ISI across the genome for the Vietnamese (KHV) and English (GBR)  
108 samples. Because some populations may share more independent selection  
109 than others, all potential population pairs are considered together when look-  
110 ing for the largest values of ISI. Table 3.1 shows the top regions returned from

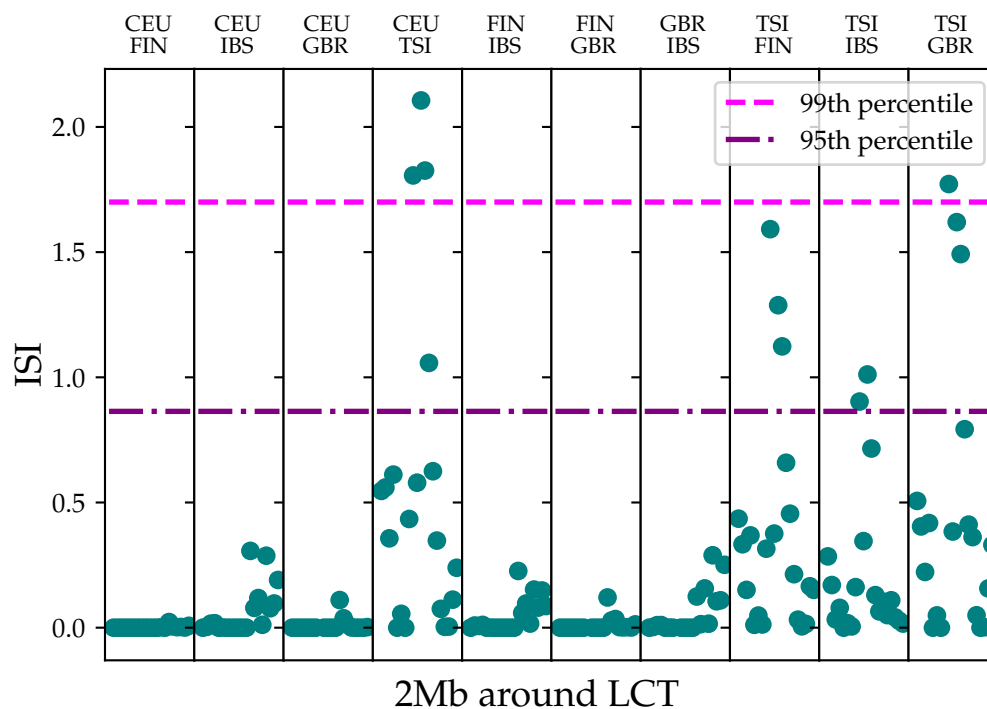

Figure 5: ISI scores for the LCT region in European populations. TSI has the weakest signal of selection in individual analysis (see Appendix C), but the largest values of ISI in the lactase region occur when TSI is compared to other European populations. This suggests that the haplotype under selection in TSI is distinct from that in other European populations, and selection on lactase in Europe is probably occurring on multiple haplotypes.

111 this analysis. These results were picked from regions with at least 50 shared  
112 SNPs between populations and ISI greater than five.

113 These regions were scanned for overlap with known coding regions (Ta-  
114 ble 2). Not all of the regions in Table 1 are present, as some of the results are  
115 found entirely in non-coding regions. The genes listed here are good candi-  
116 dates for independent selection. The function and associations of these candi-  
117 dates varies considerably. Examples include: Mitochondrial transporters  
118 (*SLC25A32*) (Spaan et al., 2005), issues with mitochondrial translation (*MRPS16*)  
119 (Miller et al., 2004), issues with melanoblast migration and cancer (*P-REX1*)  
120 (Lindsay et al., 2011), MNS blood group expression (*GYPE*) (Willemetz et al.,  
121 2015), vulvar cancer cell proliferation (*MIR3147*) (Yang and Guo, 2018), and  
122 neural tube defects (*FZD6*) (De Marco et al., 2012).

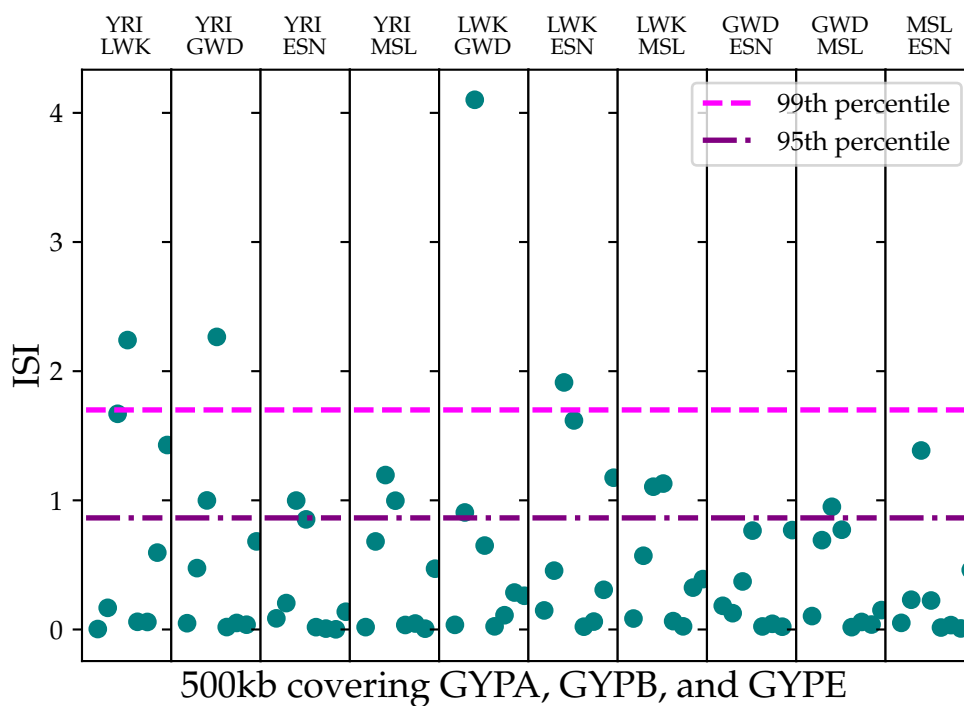

Figure 6: ISI between African populations around *GYPA*, *GYPB*, and *GYPE*. Both ancestral and independent selection is present within the African samples.

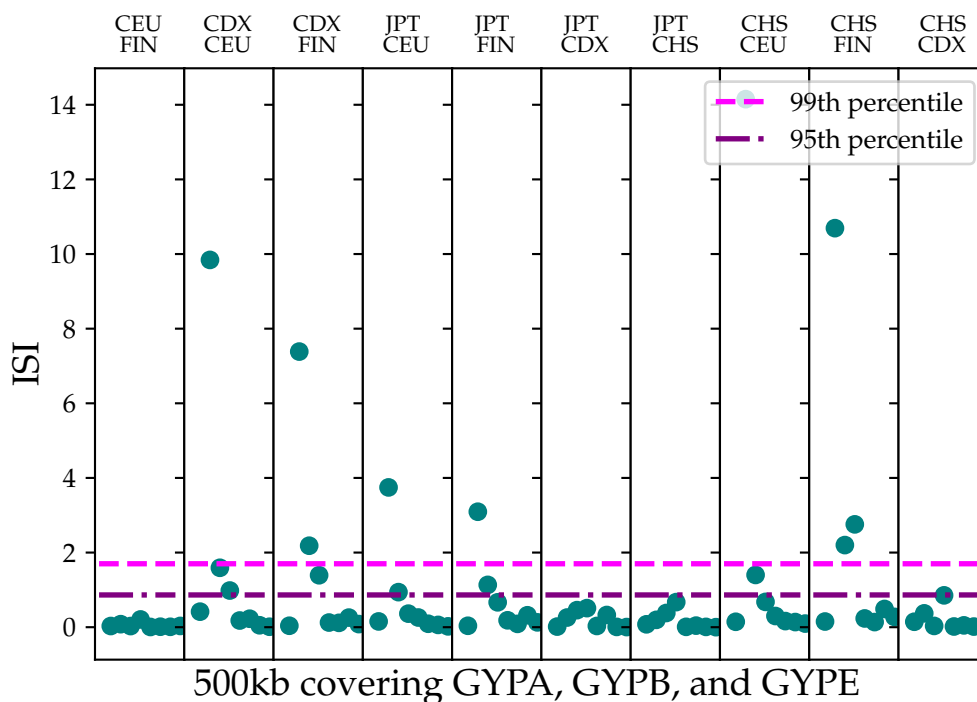

Figure 7: ISI between European and East Asian populations around *GYPA*, *GYPB*, and *GYPE*. Selection within continental regions appears to occur on a single haplotype, but occurring on independent haplotypes in the two continents.



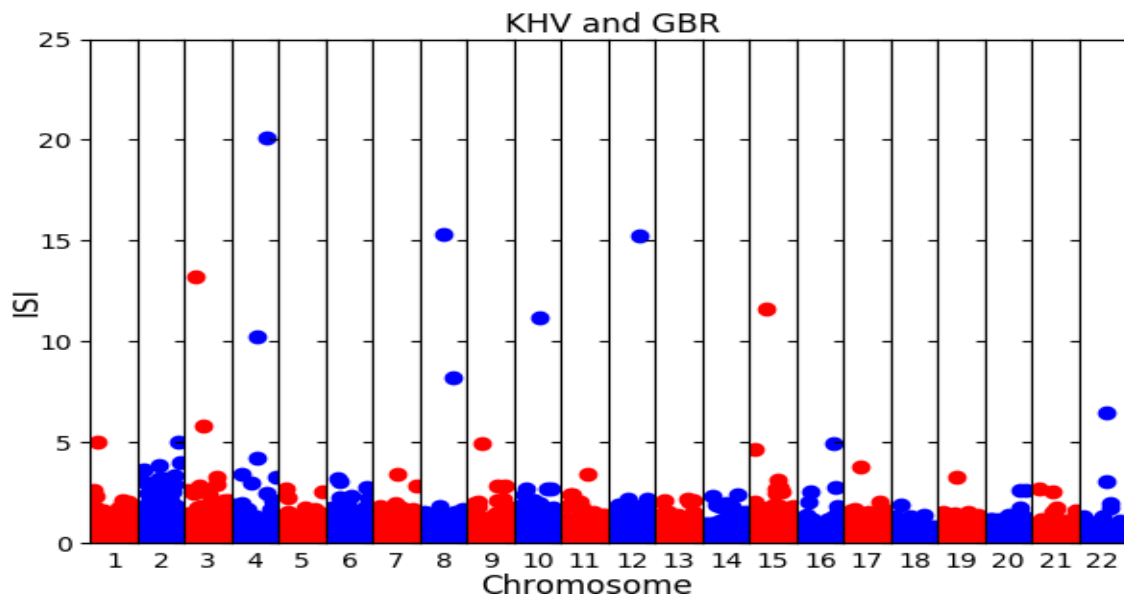

Figure 8: ISI plotted for each chromosome in the vietnamese(KHV) and English (GBR) pair. We find that some outliers are specific to population pairs, such as the outlier on chromosome three, while other outliers are found in many population pairs, such as the outliers on chromosome ten.

Table 1: Candidate regions of the genome that show the most extreme measures of independent selection in two populations.

| Chromosome | Start       | End         | Number | Population Pairs                                                                                                                                                                                                                                                                                                          |
|------------|-------------|-------------|--------|---------------------------------------------------------------------------------------------------------------------------------------------------------------------------------------------------------------------------------------------------------------------------------------------------------------------------|
| 10         | 74,921,137  | 75,197,815  | 49     | CEU-STU, JPT-TSI, JPT-CEU, KHV-GBR, KHV-TSI, KHV-CEU, CHB-GBR, CHB-TSI, CHB-CEU, CEU-ITU, CHS-TSI, CHS-CEU, CDX-GBR, CDX-TSI, CDX-CEU, CEU-MSL, CEU-ESN, CEU-YRI, CEU-ACB, CEU-LWK, CEU-PJL, TSI-GWD, TSI-ESN, CEU-GWD, TSI-YRI, TSI-ACB, TSI-LWK, TSI-PJL, GBR-PJL, GBR-GIH, TSI-GIH, CEU-GIH, TSI-BEB, CEU-BEB, TSI-STU |
| 12         | 121,773,929 | 121,873,929 | 4      | JPT-GIH, FIN-GIH, CEU-GIH, KHV-GIH                                                                                                                                                                                                                                                                                        |
| 15         | 48,526,250  | 48,626,375  | 2      | CDX-PJL, KHV-PJL                                                                                                                                                                                                                                                                                                          |
| 18         | 34,548,582  | 34,649,546  | 29     | CEU-LWK, IBS-LWK, IBS-ACB, CEU-ESN, CEU-YRI, IBS-YRI, IBS-ESN, CEU-MSL, IBS-MSL, FIN-LWK, FIN-ACB, FIN-YRI, FIN-ESN, FIN-MSL, CHS-LWK, CHS-ESN, CDX-GWD, KHV-ESN, CDX-ESN, KHV-LWK, CDX-LWK, CHS-YRI, KHV-YRI, CDX-YRI, KHV-ACB, CHS-MSL, KHV-MSL, CDX-ACB, CDX-MSL                                                       |
| 2          | 127,676,530 | 127,776,530 | 1      | CEU-STU                                                                                                                                                                                                                                                                                                                   |
| 20         | 47,187,112  | 47,287,112  | 3      | KHV-GWD, KHV-LWK, CHS-LWK                                                                                                                                                                                                                                                                                                 |
| 3          | 41,829,283  | 41,929,283  | 1      | KHV-GBR                                                                                                                                                                                                                                                                                                                   |
| 4          | 69,552,726  | 69,652,911  | 34     | JPT-YRI, JPT-GWD, LWK-GWD, FIN-YRI, YRI-ITU, GBR-YRI, IBS-YRI, YRI-PJL, GWD-ITU, FIN-GWD, GBR-GWD, IBS-GWD, GWD-PJL, FIN-LWK, GBR-LWK, IBS-LWK, LWK-PJL, CDX-YRI, KHV-YRI, CHS-YRI, KHV-GWD, CHS-GWD, CDX-FIN, FIN-BEB, FIN-STU, CDX-IBS, CDX-GBR, GBR-BEB, IBS-BEB, PJL-BEB, CDX-PJL, CDX-GIH, CHS-GIH, JPT-GIH          |
| 4          | 98,752,911  | 98,852,911  | 4      | CHS-FIN, KHV-FIN, CHS-IBS, KHV-IBS                                                                                                                                                                                                                                                                                        |
| 4          | 144,752,911 | 144,852,911 | 18     | CHS-GBR, KHV-GBR, CDX-GBR, CDX-CEU, CHS-CEU, KHV-CEU, KHV-IBS, CDX-IBS, KHV-FIN, CHS-IBS, CHS-FIN, CDX-BEB, CHS-BEB, KHV-BEB, CHB-GBR, CHB-CEU, CHB-IBS, CHB-BEB                                                                                                                                                          |
| 7          | 57,443,259  | 57,567,985  | 16     | CDX-LWK, CDX-ESN, ESN-STU, YRI-STU, LWK-STU, ACB-STU, KHV-LWK, CHS-LWK, CHB-LWK, CHB-ESN, CHB-YRI, CHB-ACB, JPT-LWK, JPT-ESN, JPT-YRI, JPT-ACB                                                                                                                                                                            |
| 7          | 124,940,406 | 125,040,406 | 1      | LWK-ESN                                                                                                                                                                                                                                                                                                                   |
| 8          | 71,648,402  | 71,748,402  | 2      | FIN-ESN, ESN-ITU                                                                                                                                                                                                                                                                                                          |
| 8          | 104,339,793 | 104,555,757 | 36     | CDX-BEB, CDX-STU, CDX-ITU, CDX-GIH, CHS-ITU, CHB-TSI, ESN-ITU, ESN-PJL, IBS-ESN, GBR-ESN, TSI-ESN, MSL-ITU, GWD-PJL, FIN-GWD, CEU-GWD, IBS-GWD, GBR-GWD, TSI-GWD, MSL-PJL, GBR-MSL, CEU-MSL, IBS-MSL, TSI-MSL, YRI-ITU, YRI-PJL, IBS-YRI, GBR-YRI, TSI-YRI, CEU-YRI, LWK-ITU, GBR-LWK, TSI-LWK                            |

Table 2: Genes that intersect with the regions of the genome that show the most extreme measures of independent selection in two populations. Some regions from Table 1 are absent here because they occur in non-coding regions.

| Chromosome | Start       | End         | Gene Symbol                                                     |
|------------|-------------|-------------|-----------------------------------------------------------------|
| chr10      | 74,921,137  | 75,189,422  | ECD, FAM149B1, DNAJC9, MRPS16, DNAJC9-AS1, ANXA7, MSS51, CFAP70 |
| chr12      | 121,773,929 | 121,873,929 | ANAPC5, BC029038, RNF34, KDM2B                                  |
| chr15      | 48,526,250  | 48,626,375  | SLC12A1, DUT                                                    |
| chr18      | 34,548,582  | 34,649,546  | KIAA1328                                                        |
| chr20      | 47,240,792  | 47,287,112  | AX746653, PREX1                                                 |
| chr3       | 41,829,283  | 41,929,283  | ULK4                                                            |
| chr4       | 98,752,911  | 98,852,911  | STPG2                                                           |
| chr4       | 144,797,907 | 144,826,660 | GYPE                                                            |
| chr4       | 144,833,483 | 144,833,483 | BC029578                                                        |
| chr7       | 57,472,730  | 57,472,730  | MIR3147                                                         |
| chr7       | 57,476,012  | 57,476,012  | DQ578920                                                        |
| chr7       | 57,509,994  | 57,529,655  | ZNF716                                                          |
| chr8       | 104,339,793 | 104,343,737 | FZD6                                                            |
| chr8       | 104,383,884 | 104,394,828 | CTHRC1                                                          |
| chr8       | 104,412,638 | 104,427,165 | SLC25A32                                                        |
| chr8       | 104,427,218 | 104,455,110 | DCAF13                                                          |
| chr8       | 104,513,114 | 104,555,757 | RIMS2                                                           |

### 123 3 DISCUSSION

124 **Using the sign of iHS** Results from the simulations show that whether selection  
125 occurs before or after a population split affects the correlation of signed  
126 iHS, but not unsigned iHS. This result is useful because it allows discrimination  
127 between independent selection and selection in a common ancestor for a  
128 particular region of interest.

129 Lactase is known to have been under recent selection in several geographic  
130 regions (Ségurel and Bon, 2017), but the genetic cause is thought to have a single  
131 origin in Europe. The results from iHS support this previous finding. Not  
132 only do four out of the five populations in Europe show evidence for shared  
133 selection in the LCT region, the correlation of signed iHS implies the variation  
134 around the selected variant is consistent with a single beneficial haplo-  
135 type. However, the fifth population, the Toscani, shows significant values of  
136 ISI around LCT. This suggests that selection around LCT in Europe was more  
137 diverse than previously believed. There is some evidence in the literature that  
138 the Eurasian genotype has arisen on more than one haplotype independently  
139 (Enattah et al., 2007). For TSI specifically, Schlebusch et al. (2013) found that  
140 a sweeping lactase persistence haplotype in the Maasai from Kenya was three  
141 times as common in Tuscans as the European haplotype. However, the variant  
142 associated with lactase persistence in the Maasai, while present in the 1000  
143 Genomes population from Kenya, is missing from the TSI sample. So while  
144 we can confirm the presence of selection around LCT in the Toscani, we cannot  
145 conclude that the same variant is sweeping.

146 The glycoprotein cluster has primarily been associated with malarial resis-  
147 tance in African populations (Wang et al., 2003). The presence of signals around  
148 these genes in populations outside the malarial zone suggests independent se-

149 lective pressure on immune characteristics at these loci, supporting previous  
150 work (Bigham et al., 2018). The most striking result is the presence of shared  
151 signals in both Asian and European populations, in which the beneficial hap-  
152 lotype is distinct not only from one another, but from the African haplotype as  
153 well. These results therefore support at least three independent origins of se-  
154 lection around the glycoprotein cluster, two of which are unlikely to be driven  
155 by malaria. A table containing ISI values for all population comparisons can  
156 be found in Appendix C.

157 Selected haplotypes also vary within geographic regions. ISI scores within  
158 Africa vary from small values, like between ESN and GWD (0.525) to large  
159 ISI values between LWK and GWD (5.65), the former implying selection on a  
160 shared haplotype and the latter implying selection on independent haplotypes.  
161 However, most values within Africa are intermediate in size, falling under, but  
162 close to, the cutoff of 1.459 for the top one percent of ISI scores. Considering  
163 that large iHS scores are present in each population, the intermediate values  
164 imply that some selection in this region is shared among African populations,  
165 while some is not. This is consistent with the observation that Africans have  
166 a larger number of variants in the glycoprotein cluster known to be associated  
167 with disease (Leffler et al., 2017), allowing simultaneous selection of variants  
168 in multiple exons rather than a single beneficial haplotype. In contrast, selec-  
169 tion in this region in European populations can largely be traced to a single  
170 beneficial haplotype. ISI values are small for pairwise comparisons in Europe  
171 with the exception of the Toscani, whose smallest ISI score occurs when com-  
172 pared with the South Asian population GIH, or Gujarati Indians from Hous-  
173 ton, Texas. This exception to the pattern may be caused by the introduction  
174 of a beneficial haplotype from one population to another, or into each from  
175 a third population, but further work will need to be done to investigate such  
176 population specific examples. .

177 While there are some population pairs with significant ISI values around  
178 well documented genes like LCT, the most extreme values of ISI are found  
179 elsewhere. The results of the genomic ISI selection scan provide a finer view  
180 of shared selection. In some cases, relatively few population pairs display ev-  
181 idence for independent selection at a locus. For example, chromosome three  
182 contains a candidate region that is shared only by the Vietnamese (KHV) and  
183 the English (GBR) (Table 2). However, there also seems to be independent  
184 selection occurring at the level of continental groups rather than individual  
185 populations. For example, the candidate region on chromosome 10 had the  
186 largest value of ISI, but is also found in many population pairs. Furthermore,  
187 the population pairs have a seemingly non-random pattern. This candidate re-  
188 gion shows up in comparisons between Europeans and Africans, Asians and  
189 Africans, and Europeans and Asians. However, it does not appear when any  
190 of the populations within each geographic region are compared to one an-  
191 other. These patterns can be seen visually by comparing the direction of the  
192 iHS scores in Figure 9. A possible explanation for this pattern is independent  
193 instances of selection in the same region of the genome, and a small sample  
194 size in the African and South Asian comparison meant it was filtered out. An-

195 other possibility is that South Asians and Africans actually share more of their  
196 haplotype.

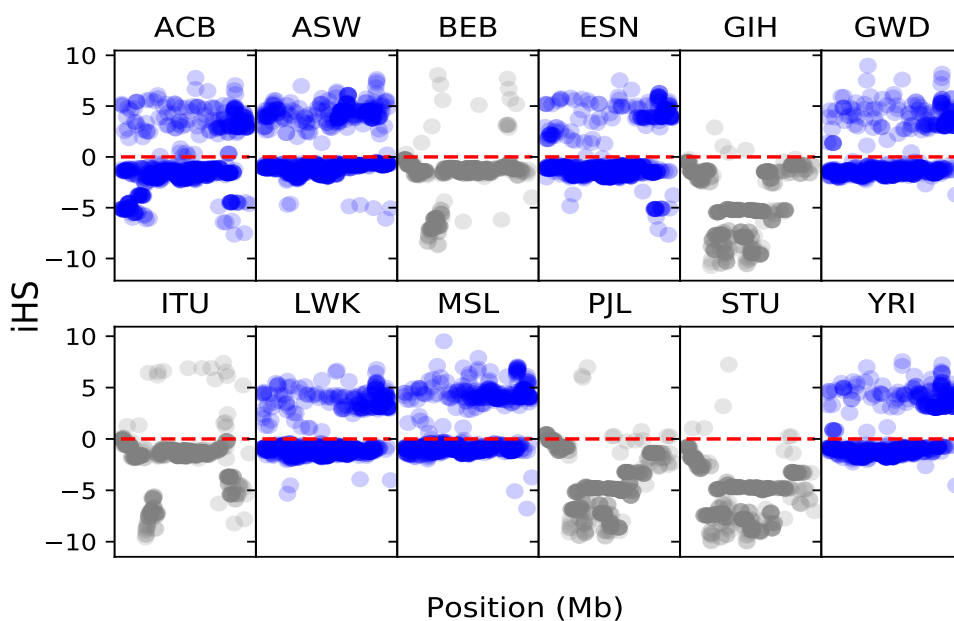

Figure 9: iHS results for candidate region located on chromosome 10 in African (blue) and South Asian (gray) populations.

197 The methods developed here allow new insights into well studied loci such  
198 as LCT, and have the potential to scan for new signals of loci under selection  
199 by considering the sign of iHS. Specifically, ISI shows that patterns of shared  
200 independent selection may occur for specific population pairs or between ge-  
201 ographic regions. Instances of shared selection will need to be investigated  
202 individually and we are optimistic that the work presented here will open new  
203 avenues of research.

## 204 4 METHODS

205 **Data** The 1000 Genomes Phase 3 variant data were obtained from `ftp://ftp.`  
206 `1000genomes.ebi.ac.uk/vol11/ftp/` for populations with ancestry from South  
207 Asia, East Asia, Europe, and Africa. American populations and the African  
208 American sample were removed due to recent extensive admixture. Multial-  
209 lelic sites were removed.

210 **Correlation of iHS and correlation of |iHS|** iHS and |iHS| were calculated  
211 using the *Selscan* package (Szpiech and Hernandez, 2014) for each population

212 in the 1000 Genomes Phase 3 data. Correlation of *iHS* (signed) scores from one  
213 population with scores from another was calculated for each possible pair of  
214 populations. This process was repeated for  $|iHS|$ . Confidence intervals were  
215 generated using a moving blocks bootstrap (Liu and Singh, 1992) with a block  
216 size of 500 kb.

217 The LCT and glycoporphin cluster subdivisions contained a megabase of  
218 flanking region and 125kb flanking regions respectively. The difference in the  
219 choice of flank size reflects the size of the regions. A flanking region around  
220 LCT was used to increase this sample size and allow bootstrap replicates to  
221 be used to generate confidence intervals. This makes sense in the case of LCT  
222 because the block of LD surrounding the locus is exceptionally large because  
223 selection at LCT was especially strong and relatively recent. The small flanking  
224 region for the glycoporphin cluster was used to increase the size of the region  
225 to make the bootstrap replicate size used for the genome as a whole. While  
226 this region is still too small for bootstrap replicates, this approach allows us to  
227 directly compare the resulting 500kb region to genic or nongenic regions in the  
228 genome.

229 **Simulations** Simulated data were generated using the Selection on Linked  
230 Mutations (SLiM) package (Messer, 2013; Haller and Messer, 2018). In each  
231 simulation a single population splits into two at a pre-specified time. A set of  
232 neutral simulations were run first to generate a set of neutral data to compare  
233 to models that include selection.

234 Two types of simulations with selection were conducted. First, a single  
235 beneficial mutation ( $N = 10,000$   $s = 0.025$ ) is introduced into the population  
236 before it splits. If this mutation is not lost to drift, the simulation continues  
237 with selection until the present. In the second model, a beneficial mutation  
238 ( $N = 10,000$ ,  $s = 0.05$ ) is inserted into both populations following the split.  
239 These mutations are inserted at the same location in the middle of the chromo-  
240 some, and the simulation is restarted if either is lost to drift. The difference in  
241 selection coefficient between the two models exists because we wanted to test  
242 the effect of a beneficial allele that started in an ancestral population but can  
243 continue to sweep in daughter populations. This being the case, selection will  
244 be occur for twice as long in the models in which the beneficial allele is intro-  
245 duced before the population split. However, we did not want the results of  
246 these two models to differ due to length of selection. We therefore halved the  
247 selection coefficient in the ancestral-selection model, because the time required  
248 for any given change is proportional to  $1/s$  (Crow et al., 1970).

249 *iHS* was calculated for each simulation using *selscan* (Szpiech and Hernan-  
250 dez, 2014). Due to the sensitivity of *iHS* to small allele frequencies, sites with  
251 a minor allele frequency less than 0.05 were removed. Simulations with se-  
252 lection were standardized for allele frequency jointly with neutral simulations  
253 with the same divergence time. We standardized each *iHS* value by subtract-  
254 ing off the mean *iHS* across the genome for sites in the same allele-frequency  
255 bin. These means were calculated within 10 bins of allele frequency, spanning  
256 the range from 0 to 1.

257 **Candidate regions for independent selection** To find candidate regions for

258 independent selection, each population pair was divided into 100 kb regions.  
259 ISI was calculated for each region. ISI was favored over covariance and corre-  
260 lation because of differences in variance between the populations. In addition,  
261 the statistic is intuitive, as the two terms it contains should approach the same  
262 value when iHS scores have the same sign.

263 The results from all population pairs were concatenated and the results  
264 with the top one percent of ISI were observed. The regions with the most ex-  
265 treme scores commonly had very small sample sizes. As a result, we trimmed  
266 the results to only include regions with at least 50 SNPs shared between the  
267 population pair. All population pairs were considered together because there  
268 is no reason to suspect that the number of shared signals due to independent  
269 selection is similar in each pair. For example, populations that split very re-  
270 cently are less likely to show evidence of independent selection because little  
271 time has elapsed and they more likely to share ancestral haplotypes.

## 272 References

- 273 Bigham, A. W., Magnaye, K., Dunn, D. M., Weiss, R. B., and Bamshad, M.  
274 (2018). Complex signatures of natural selection at GYPA. *Human genetics*,  
275 137(2):151–160.
- 276 Crow, J. F., Kimura, M., and Others (1970). *An introduction to population genetics*  
277 *theory*. New York, Evanston and London: Harper & Row, Publishers.
- 278 De Marco, P., Merello, E., Rossi, A., Piatelli, G., Cama, A., Kibar, Z., and Capra,  
279 V. (2012). FZD6 is a novel gene for human neural tube defects. *Human muta-*  
280 *tion*, 33(2):384–390.
- 281 Enattah, N. S., Trudeau, A., Pimenoff, V., Maiuri, L., Auricchio, S., Greco, L.,  
282 Rossi, M., Lentze, M., Seo, J. K., Rahgozar, S., Khalil, I., Alifrangis, M., Natah,  
283 S., Groop, L., Shaat, N., Kozlov, A., Verschubskaya, G., Comas, D., Bulayeva,  
284 K., Mehdi, S. Q., Terwilliger, J. D., Sahi, T., Savilahti, E., Perola, M., Sajantila,  
285 A., Järvelä, I., and Peltonen, L. (2007). Evidence of still-ongoing convergence  
286 evolution of the lactase persistence T-13910 alleles in humans. *American jour-*  
287 *nal of human genetics*, 81(3):615–625.
- 288 Haller, B. C. and Messer, P. W. (2018). SLiM 3: Forward genetic simulations  
289 beyond the Wright-Fisher model. *bioRxiv*, page 418657.
- 290 Harris, A. M. and DeGiorgio, M. (2019). Identifying and classifying shared  
291 selective sweeps from multilocus data. *bioRxiv*, 446005.
- 292 Johnson, K. E. and Voight, B. F. (2018). Patterns of shared signatures of recent  
293 positive selection across human populations. *Nature Ecology & Evolution*,  
294 2(4):713–720.
- 295 Leffler, E. M., Band, G., Busby, G. B. J., Kivinen, K., Le, Q. S., Clarke, G. M.,  
296 Bojang, K. A., Conway, D. J., Jallow, M., Sisay-Joof, F., Bougouma, E. C.,

- 297 Mangano, V. D., Modiano, D., Sirima, S. B., Achidi, E., Apinjoh, T. O., Marsh,  
298 K., Ndila, C. M., Peshu, N., Williams, T. N., Drakeley, C., Manjurano, A.,  
299 Reyburn, H., Riley, E., Kachala, D., Molyneux, M., Nyirongo, V., Taylor,  
300 T., Thornton, N., Tilley, L., Grimsley, S., Drury, E., Stalker, J., Cornelius, V.,  
301 Hubbart, C., Jeffreys, A. E., Rowlands, K., Rockett, K. A., Spencer, C. C. A.,  
302 Kwiatkowski, D. P., and Malaria Genomic Epidemiology Network (2017).  
303 Resistance to malaria through structural variation of red blood cell invasion  
304 receptors. *Science*, 356(6343).
- 305 Lindsay, C. R., Lawn, S., Campbell, A. D., Faller, W. J., Rambow, F., Mort, R. L.,  
306 Timpson, P., Li, A., Cammareri, P., Ridgway, R. A., Morton, J. P., Doyle, B.,  
307 Hegarty, S., Rafferty, M., Murphy, I. G., McDermott, E. W., Sheahan, K., Pe-  
308 done, K., Finn, A. J., Groben, P. A., Thomas, N. E., Hao, H., Carson, C., Nor-  
309 man, J. C., Machesky, L. M., Gallagher, W. M., Jackson, I. J., Van Kempen,  
310 L., Beermann, F., Der, C., Larue, L., Welch, H. C., Ozanne, B. W., and San-  
311 som, O. J. (2011). P-Rex1 is required for efficient melanoblast migration and  
312 melanoma metastasis. *Nature communications*, 2:555.
- 313 Liu, R. Y. and Singh, K. (1992). Moving blocks jackknife and bootstrap capture  
314 weak dependence. In LePage, R. and Billard, L., editors, *Exploring the "Lim-  
315 its" of the Bootstrap*, pages 225–248. Wiley, New York.
- 316 Messer, P. W. (2013). SLiM: simulating evolution with selection and linkage.  
317 *Genetics*, 194(4):1037–1039.
- 318 Miller, C., Saada, A., Shaul, N., Shabtai, N., Ben-Shalom, E., Shaag, A., Her-  
319 shkowitz, E., and Elpeleg, O. (2004). Defective mitochondrial translation  
320 caused by a ribosomal protein (MRPS16) mutation. *Annals of neurology*,  
321 56(5):734–738.
- 322 Pickrell, J. K., Coop, G., Novembre, J., Kudaravalli, S., Li, J. Z., Absher, D.,  
323 Srinivasan, B. S., Barsh, G. S., Myers, R. M., Feldman, M. W., and Pritchard,  
324 J. K. (2009). Signals of recent positive selection in a worldwide sample of  
325 human populations. *Genome research*, 19(5):826–837.
- 326 Schlebusch, C. M., Sjödin, P., Skoglund, P., and Jakobsson, M. (2013). Stronger  
327 signal of recent selection for lactase persistence in maasai than in europeans.  
328 *European journal of human genetics: EJHG*, 21(5):550–553.
- 329 Ségurel, L. and Bon, C. (2017). On the evolution of lactase persistence in hu-  
330 mans. *Annual review of genomics and human genetics*, 18:297–319.
- 331 Spaan, A. N., Ijlst, L., van Roermund, C. W. T., Wijburg, F. A., Wanders, R.  
332 J. A., and Waterham, H. R. (2005). Identification of the human mitochondrial  
333 FAD transporter and its potential role in multiple acyl-CoA dehydrogenase  
334 deficiency. *Molecular genetics and metabolism*, 86(4):441–447.
- 335 Szpiech, Z. A. and Hernandez, R. D. (2014). Selscan: An efficient multithreaded  
336 program to perform EHH-based scans for positive selection. *Molecular biol-  
337 ogy and evolution*, 31(10):2824–2827.



- 338 Voight, B. F., Kudravalli, S., Wen, X., and Pritchard, J. K. (2006). A map of  
339 recent positive selection in the human genome. *PLoS biology*, 4(3):0446–0458.
- 340 Wang, H.-Y., Tang, H., Shen, C.-K. J., and Wu, C.-I. (2003). Rapidly evolv-  
341 ing genes in human. i. the glycoporphins and their possible role in evading  
342 malaria parasites. *Molecular biology and evolution*, 20(11):1795–1804.
- 343 Willemetz, A., Nataf, J., Thonier, V., Peyrard, T., and Arnaud, L. (2015). Gene  
344 conversion events between GYPB and GYPE abolish expression of the S and  
345 s blood group antigens. *Vox sanguinis*, 108(4):410–416.
- 346 Yang, X.-H. and Guo, F. (2018). mir3147 serves as an oncomir in vulvar  
347 squamous cell cancer via smad4 suppression. *Molecular medicine reports*,  
348 17(5):6397–6404.
